# Supplementary material for: Biosynthetically grown dendritic silver nanostructures for visible Surface Enhanced Resonance Raman Spectroscopy (v-SERRS)
Source: Royal Society of Chemistry journal article supplement (doi:10.1039/d0nj03040f), 2020-01-01
Supplement: d0nj03040f1.pdf [file d0nj03040f1.pdf]

## Electronic Supplementary Information

### **Biosynthetically grown dendritic silver nanostructures for **visible** Surface Enhanced **Resonance** Raman Spectroscopy (v-SERRS)**

Subhavna Juneja<sup>a</sup>, Jaydeep Bhattacharya<sup>a\*</sup>

<sup>a</sup>NanoBiotechnology Lab, School of Biotechnology, Jawaharlal Nehru University, New Delhi - 110067.

#### **\*Corresponding Author Detail**

Dr. Jaydeep Bhattacharya

Assistant Professor

School of Biotechnology, Jawaharlal Nehru University,

New Mehrauli Road, New Delhi-110067

Email: jaydpb@gmail.com, jaydeep@jnu.ac.in

## 1. Experimental Parameters and Details

### 1.1 Growth and maintenance of bacterial culture

Bacterial strain *S.aureus* was cultivated aerobically in LB media overnight (12-14 hours) at 37 °C and 200 rpm (Primary culture). Following incubation, 1 ml of the bacterial culture was inoculated into 30 ml of freshly autoclaved LB media (Secondary culture) and allowed to grow for another 2 hours under normal growth conditions to attain exponential growth phase for the cells. Cell growth was monitored by measuring optical density (OD) at 600 nm. For approximation, an OD value of 0.5 was equated to a cell density of  $\sim 10^8$  CFU/ml. Colony culture assay of *S.aureus* with different cell population obtained by serial dilution (Fig. ES1) was also performed to testify the dilution correctness. The experimental data is summarised as Table ES1.

**Fig. ES1** Colony culture of *S.aureus* with different cell population obtained by serial dilution.

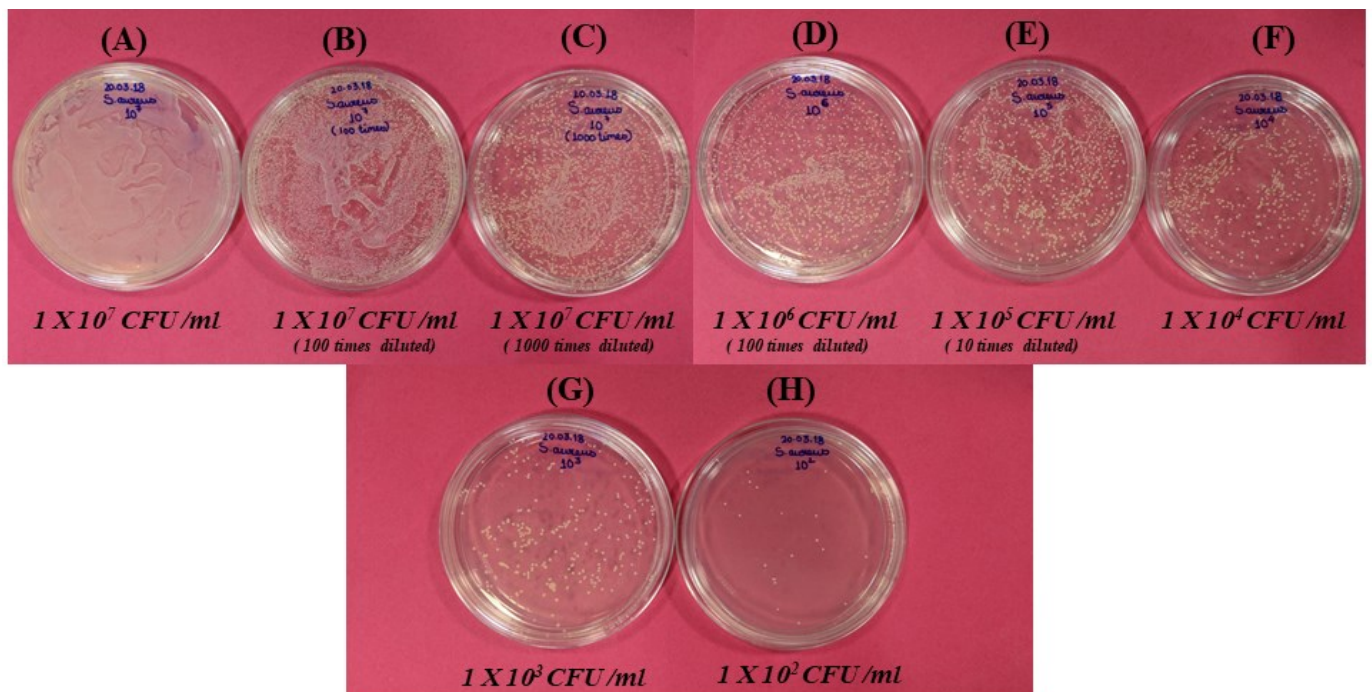

**Table ES1.** Comparative between the numbers of colonies expected and obtained from the serially diluted *S.aureus* samples used to acquire SERS spectrum. For each plate 200  $\mu$ l of the respective cell culture was used.

| S.No | CFU/ml | Dilution   | Expected Colonies (100 $\mu$ l) | Actual Colonies | Average   | Standard Deviation |
|------|--------|------------|---------------------------------|-----------------|-----------|--------------------|
| 1.   | $10^7$ | 1000 times | 1000                            | 995/997/983     | 991.66667 | 7.57188            |
| 2.   | $10^6$ | 100 times  | 1000                            | 954/892/1013    | 953       | 60.5062            |
| 3.   | $10^5$ | 10 times   | 1000                            | 986/990/971     | 982.33333 | 10.01665           |
| 4.   | $10^4$ | -          | 1000                            | 967/877/948     | 930.66667 | 47.43768           |
| 5.   | $10^3$ | -          | 100                             | 150/106/89      | 115       | 31.48015           |
| 6.   | $10^2$ | -          | 10                              | 9/13/11         | 11.16667  | 1.75594            |

## 1.2 SERS measurements

All the SERS and Raman imaging experiments were conducted using WiTec Alpha 300 Combined Confocal Raman AFM system (Germany) equipped with a 532 nm laser line. Prior to every SERS experiment, the system was calibrated using a standard silicon substrate centred at  $520\text{ cm}^{-1}$ . Laser excitation operated at 2 mW power was used for sample excitation (both R6G and *S.aureus*). The magnification was kept at 10x. SERS substrates were prepared by drop casting 5  $\mu$ L colloidal dendritic silver sample onto a 1 cm x 1 cm silicon wafer followed by overnight air drying at RT. Integration time and number of accumulations per measurement was 2 sec and 50 respectively. For reproducibility data, a minimum of 10 spectra were recorded for each analyte at each concentration.

### Rhodamine 6G (R6G) detection

A 10mM stock solution of R6G in water was prepared in a standard volumetric flask and labelled as stock solution. Different aqueous solutions of R6G dye with effective concentrations between  $1 \times 10^{-8}$  –  $1 \times 10^{-15}$  were prepared by serial dilution. These dilutions were designated as working solutions (WS, Table ES). Experimental readings were recorded after drop casting 5  $\mu$ L of the WS

solution onto a cleaned Ag coated SERS substrate followed by exposure to the laser for acquiring Raman signals.

**Table ES2. Different concentrations of R6G dye used for SERS experiments**

| S.No | Working Solution<br>(WS) | Concentration<br>(M) |
|------|--------------------------|----------------------|
| 1.   | WS1                      | $1 \times 10^{-8}$   |
| 2.   | WS2                      | $1 \times 10^{-9}$   |
| 3.   | WS3                      | $1 \times 10^{-10}$  |
| 4.   | WS4                      | $1 \times 10^{-12}$  |
| 5.   | WS5                      | $1 \times 10^{-15}$  |

#### **4- Mercaptopyridine (4-MPy) detection**

Similar to R6G, from a 1M stock solution of 4-MPy in water prepared in a standard volumetric flask, different aqueous solutions with effective concentrations between  $1 \times 10^{-3}$  –  $1 \times 10^{-8}$  were prepared by serial dilution. Experimental readings were recorded by drop casting 5  $\mu$ L of dye solution onto a clean SERS substrate followed by Raman measurements.

#### **S.aureus detection**

Once the OD<sub>600</sub> of the *S.aureus* secondary culture reached  $\sim 0.5$ , 10 ml of the bacterial solution was transferred into autoclaved centrifuged tubes. Cell suspensions were subjected to centrifugation at 8000 rpm for 10 minutes to separate the cell mass. The cell pellet at the bottom was re-dispersed in an equal amount of water to maintain the cell density. Samples with varied cell population ( $10^7$ - $10^1$  CFU/ml) were prepared through serial dilution of the parent cell samples ( $10^8$  CFU/ml). The same dilution was also verified/ visualised by colony counting method (Fig. ES1). Experimental readings were recorded in similar manner as it was done for the R6G dye detection.

## **2. Characterization**

Morphological and chemical composition characterisations were done using Transmission Electron Microscope (JEOL 2100F) equipped with EDAX/Mapping analysis facility. The TEM was performed at an accelerating voltage of 200 kV. HRTEM and SAED acquisition was performed on the same instrument. Absorption spectra were recorded on PerkinElmer lambda-25 UV-Vis-NIR spectrophotometer. FTIR measurements were acquired on Varian 7000 FT-IR/Raman Spectrometer with Microscope. X-ray diffraction analysis of the synthesized dendritic Ag sample was performed in the thin film mode using X'Pert PRO Analytical X-ray diffractometer using Cu K $\alpha$  radiation ( $\lambda = 1.54 \text{ \AA}$ ) in the range  $2\theta = 20\text{--}80^\circ$  operated at 40 keV. The obtained XRD patterns were matched with reference data from the JCPDS database. AFM micrographs were collected using the Combined Confocal Raman-AFM WiTec Alpha 300RA instrument. Laser 532 nm line was used as excitation source. All the images were recorded in the AC/tapping mode using the non-contact version while all the image processing was performed on the WiTec Project 4 software provided with the instrument.

### 3. Phytochemical Screening

#### Experimental details of the tests performed<sup>1-5</sup>

- 1. Wagner's Test:** A few drops of the Wagner's reagent (Iodine in Potassium Iodide) were added to 1 ml of green tea extract along the sides of the glass vial. Appearance of reddish brown precipitate is a positive confirmation for the alkaloids, which was absent in our case.
- 2. Benedict's test:** Green Tea extract and Benedicts' reagent\* were mixed in 1:1 ratio. After addition, the mixture was heated on a water bath for 2-5 minutes. The change of colour confirms the presence of sugars in the extract. Green/Blue, orange yellow and brick red indicates traces, moderate and high levels of reducing sugars respectively.  
*(\* Benedict's solution = 100 g of anhydrous sodium carbonate + 173 g of sodium citrate + 17.3 g of copper(II) sulfate pentahydrate in 1000 ml Milli Q)*
- 3. Legal's test:** 1 ml of Green Tea Extract was mixed with Sodium Nitroprusside in Pyridine and NaOH (10%) till a 1:1 ratio was achieved. No colour change in our case indicates absence of cardiac glycosides however, in presence of glycosides; the reaction mix would change the colour to red/pink.
- 4. Froth Test:** The Green Tea Extract (2ml) was diluted upto 20 ml by adding Milli Q into a 50 ml graduated cylinder. The extract carrying cylinder was shaken for 15 minutes continuously. Presence of 2 cm foam at the solution air interface confirmed saponin presence.
- 5. Salkowskis' Test:** Green Tea Extract was treated with chloroform followed by addition of a few drops of Conc. Sulphuric acid. After acid addition, the reaction mix *was mixed gently and allowed to stand for 15 minutes. Appearance of golden yellow* colour confirmed triterpenes presence.
- 6. Ferric Chloride Test:** 5 ml Green Tea Extract was dissolved in 5 ml of distilled water. To this, few drops of ferric chloride solution (5%) were added. Appearance of green colour confirms phenol presence in the extract.
- 7. Gelatin Test:** 5 ml Green Tea extract was mixed with 2 ml of 1% Gelatin solution in 10% NaCl. Tannin presence was confirmed upon appearance of white precipitates.
- 8. Alkaline Test:** Few drops of sodium hydroxide solution (10%) was added to 2 ml Green Tea Extract. Appearance of deep yellow colour that fades upon treatment with a dilute acid confirms flavaniods.
- 9. Bradfords' Test:** To 200 µl Green Tea Extract, 800µl of Bradfords' reagent<sup>§</sup> was added. The reaction mix was gently vortexed and allowed to incubate at room temperature for the next 5 minutes. Appearance of green colour indicates presence of proteins.  
*(<sup>§</sup>Bradford reagent: 50 mg Coomassie Brilliant Blue was mixed with 50 ml methanol followed by addition of 100 ml 85% w/v phosphoric acid. Acid solution should be added slowly into the water and not vice-versa as a safety precaution. The reagent was filtered using Whatmann filter paper #1 to remove any precipitates. The solution was stored in dark at 4°C.)*

## Results

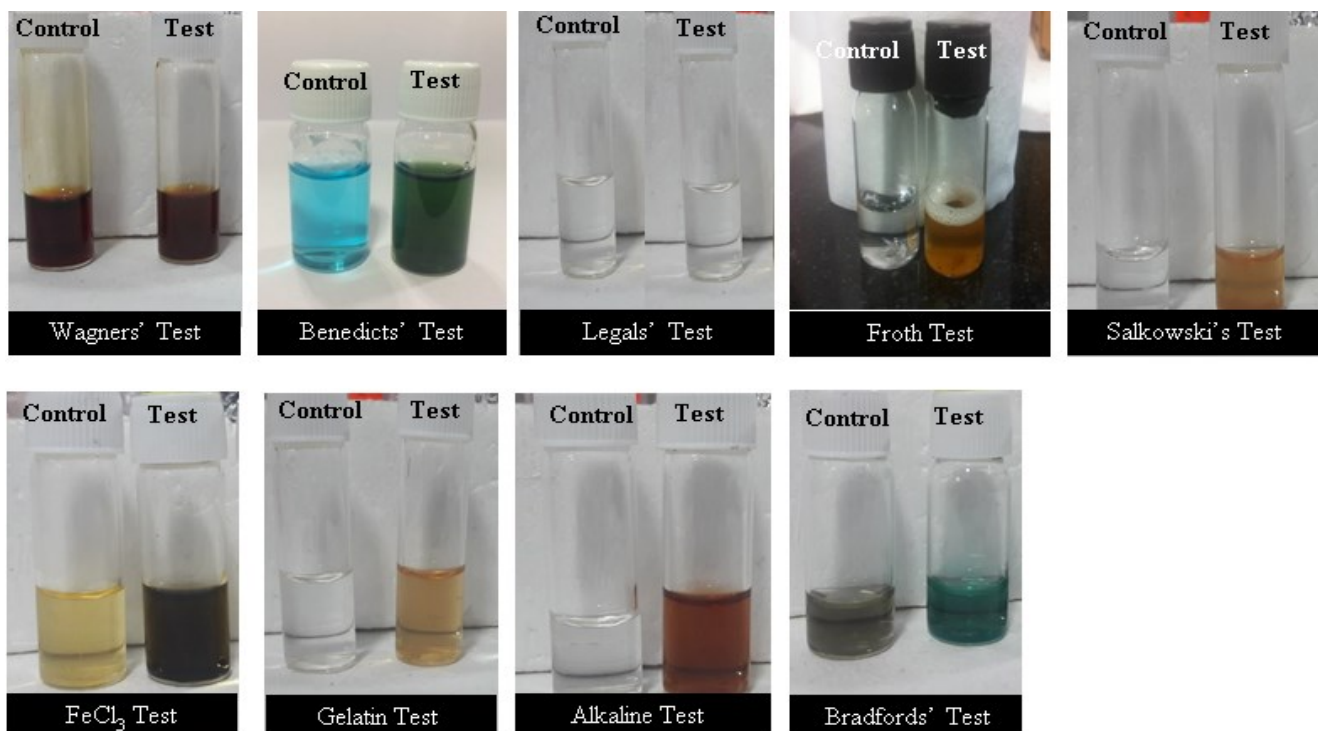

**Fig. ES2.** Colorimetric changes observed for GTE screened for the presence of different phytochemicals. Control vial contains Milli Q while test contains GTE

| S.No | Test              | Phytochemical Screened | Result   |
|------|-------------------|------------------------|----------|
| 1.   | Wagners'          | Alkaloids              | Negative |
| 2.   | Benedicts'        | Carbohydrates          | Positive |
| 3.   | Legals'           | Cardiac Glycosides     | Negative |
| 4.   | Froth             | Saponins               | Positive |
| 5.   | Salkowski's       | Phytosterols           | Positive |
| 6.   | FeCl <sub>3</sub> | Phenols                | Positive |
| 7.   | Gelatin           | Tannins                | Negative |
| 8.   | Alkaline          | Flavonoids             | Positive |
| 9.   | Bradfords'        | Proteins               | Positive |

#### 4. Thin Layer Chromatography

Thin Layer Chromatography was performed for identification of metabolites in GTE. Thin layer planar chromatogram was used to separate the amino acid constituents from GTE. Conventional TLC procedure using n-butanol: acetic acid: water (12:5:3) was performed. Comprising groups were identified and mapped using standard amino acids. The experiment was run for 40 minutes to allow considerable separation. The following chemicals were used for the TLC analysis: L-amino acids (Tryptophan, Proline, Phenylalanine, Glutamine, Glycine, Leucine) standards were procured from SRL India. n-Butanol and Glacial acetic acid were obtained from Fischer Scientific. Milli Q was used as the solvent everywhere unless mentioned elsewhere.<sup>1,2</sup>

**Table ES3. Comparative R<sub>f</sub> values for different amino acids obtained**

| S.No | Amino Acid        | Literature | Experimental           |
|------|-------------------|------------|------------------------|
| 1.   | Tryptophan        | 0.80       | 0.69                   |
| 2.   | Proline           | 0.43       | 0.40                   |
| 3.   | Phenylalanine     | 0.68       | 0.68                   |
| 4.   | Glutamine         | 0.33       | 0.38                   |
| 5.   | Glycine           | 0.40       | 0.31                   |
| 6.   | Leucine           | 0.58       | 0.66                   |
| 7.   | Alanine           | 0.24       |                        |
| 8.   | Valine            | 0.4        |                        |
| 9.   | Tyrosine          | 0.42       |                        |
| 10.  | Lysine            | 0.58       |                        |
| 11.* | Green Tea Extract |            | 0.65, 0.54, 0.45, 0.38 |

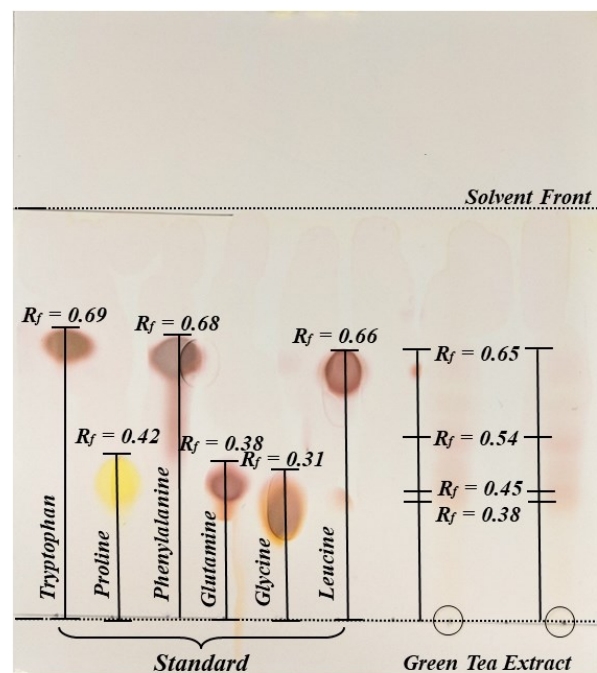

**Fig. ES3.** Thin Layer Chromatogram (TLC) of the used Green Tea extract indicating the different present amino acids.



## 5. SERS Reproducibility at $10^1$ CFU/ml

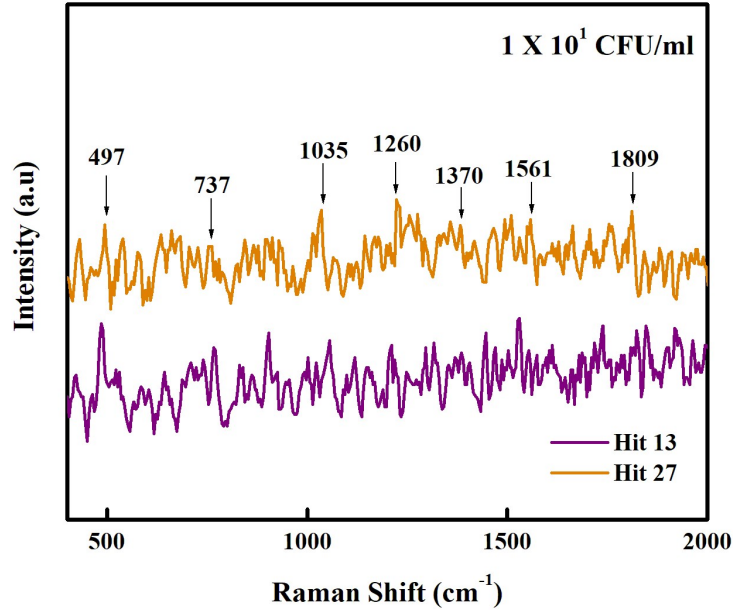

**Fig. ES4.** SERS spectrum for *S.aureus* ( $1 \times 10^1$  CFU/ml). The spectrum acquisition was attainable but not repetitive. This data were obtained at the 13<sup>th</sup> and the 27<sup>th</sup> hit.

**Table ES4** Reader reference compilation of different biosynthetic routes adopted for synthesizing nanostructures.

| S.No | Morphology        | Reducing Agent                                            | Reference |
|------|-------------------|-----------------------------------------------------------|-----------|
| 1.   | Nanowire/Nanobars | <i>Camellia sinensis</i> /PVP                             | [6]       |
| 2.   | Nanoparticles     | Black Tea , Green Tea                                     | [7]       |
| 3.   | Nanoparticles     | Pomegranate Peel extract                                  | [8]       |
| 4.   | Nanoparticles     | Soluble Green Tea Powder                                  | [9]       |
| 5.   | Nanoparticles     | Black Tea extract                                         | [10]      |
| 6.   | Nanoparticles     | <i>Acalypha hispida</i> leaf extract                      | [11]      |
| 7.   | Nanoparticles     | Bauhinia tomentosa Linn. leaves extract                   | [12]      |
| 8.   | Nanoparticles     | Blackberry, Blueberry, Pomegranate and Turmeric extracts. | [13]      |

|     |                            |                                       |      |
|-----|----------------------------|---------------------------------------|------|
| 9.  | Nanoparticles              | Aqueous Sorghum Bran extract          | [14] |
| 10. | Anisotropic(urchin shaped) | <i>Camellia sinensis</i>              | [15] |
| 11. | Nanoparticles              | <i>Camellia sinensis</i> leaf extract | [16] |

**Fig. ES5 TEM low magnification**

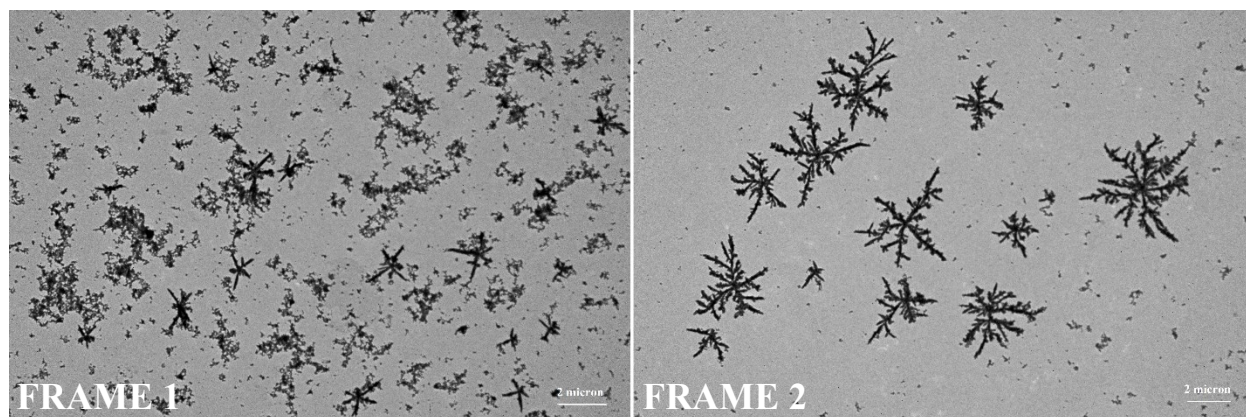

**Table ES5 Reader reference compilation of different methodologies adopted for synthesizing dendritic silver nanostructures**

| S.No | Morphology       | Synthesis Method         | Templates used, if any    | Reference |
|------|------------------|--------------------------|---------------------------|-----------|
| 1.   | Dendritic Silver | Electrodeposition        | -                         | [17]      |
| 2.   | Dendritic Silver | Ultrasonic Irradiation   | Isopropanol , PEG 400     | [18]      |
| 3.   | Dendritic Silver | Photocatalytic reduction | Zinc Oxide crystals       | [19]      |
| 4.   | Dendritic Silver | Replacement Reaction     | Zinc Plate                | [20]      |
| 5.   | Dendritic Silver | Wet Chemical Route       | CTAB/SDBS surfactant mix  | [21]      |
| 6.   | Dendritic Silver | Chemical Route           | p-Aminoazobenzene (PA)    | [22]      |
| 7.   | Dendritic Silver | Electrodeposition        | Triblock copolymer P123   | [23]      |
| 8.   | Dendritic Silver | Sonoelectrochemistry     | PVP                       | [24]      |
| 9.   | Dendritic Silver | Chemical Reduction       | TTF                       | [25] [30] |
| 10.  | Dendritic Silver | Electrodeposition        | Au foil, KNO <sub>3</sub> | [26]      |

|     |                              |                                           |                                                                                              |      |
|-----|------------------------------|-------------------------------------------|----------------------------------------------------------------------------------------------|------|
| 11. | Fractal and Dendritic Ag, Au | Chemical Route                            | Au(PPh <sub>3</sub> )Cl, Ag(PPh <sub>3</sub> ) <sub>4</sub> NO <sub>3</sub> , CTAB/TOAB, PVP | [27] |
| 12. | Dendritic Ag                 | Self-Assembly                             | Amphiphilic calix[4]arene molecule                                                           | [28] |
| 13. | Dendritic Ag                 | Electrodeposition                         | Surfactant                                                                                   | [29] |
| 14. | Dendritic Ag                 | Replacement Reaction                      | Silicon Wafer, HF                                                                            | [31] |
| 15. | Dendritic Ag                 | Electroless galvanic replacement reaction | Cu substrate, Sulfate ions                                                                   | [32] |

Fig. ES6 Raman of *S.aureus* with and without dendritic silver.

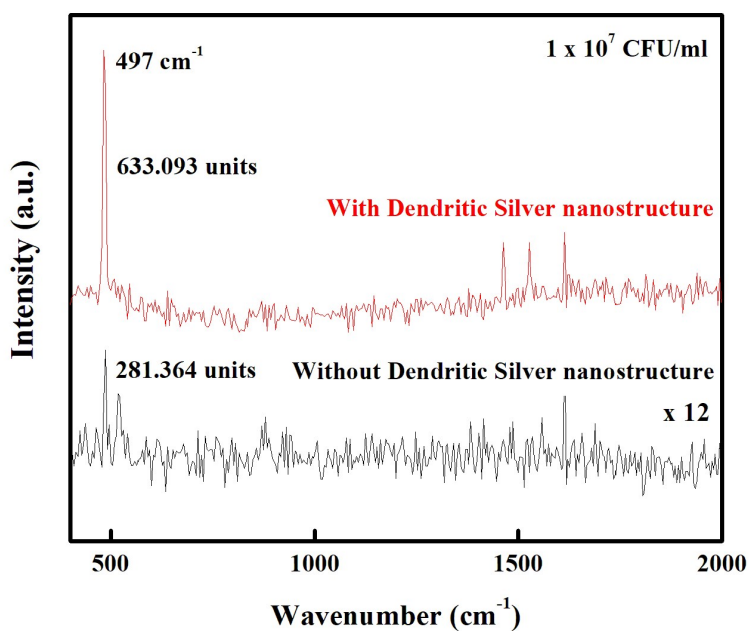

Intensity at 497 cm<sup>-1</sup>

With dendritic nanostructure = 633.093 units

Without dendritic nanostructure = 23.447 units (281.364 /12)

Estimated signal increment = 633.093:23.447 = ~ 27.009

**Table ES6 Reader references for *S.aureus* detection using different nanostructure morphology and methodologies**

| S.No | Morphology                                                              | Analyte                                        | LOD   EF                                                             | Reference |
|------|-------------------------------------------------------------------------|------------------------------------------------|----------------------------------------------------------------------|-----------|
| 1.   | Self-assembled Ag nanocrystals                                          | <i>S.aureus</i>                                | 10 CFU/ml   $2.47 \times 10^7$                                       | [33]      |
| 2.   | Au-coated magnetic nanoparticles (AuMNPs) core/shell nanocomposites     | PATP<br><i>S.aureus</i>                        | $10^{-9}$ M<br>$10^1$ cells/ml                                       | [34]      |
| 3.   | AuNps embedded mesoporous silica                                        | <i>S.aureus</i>                                | $10^6$ CFU/mL   900 times                                            | [35]      |
| 4.   | Gold nanoparticles conjugated aptamer                                   | <i>S.aureus</i><br><i>S. typhimurium</i>       | 35 CFU/ mL<br>15 CFU /mL                                             | [36]      |
| 5.   | Polyethylenimine (PEI)-modified Au coated magnetic microspheres         | <i>S.aureus</i>                                | $10^3$ CFU/ml                                                        | [37]      |
| 6.   | Single domain antibody coated nanoparticle labels and magnetic trapping | <i>S.aureus</i>                                | 1 cell/ml                                                            | [38]      |
| 7.   | Biosynthesized Ag nanoparticles                                         | <i>S.aureus</i><br><i>E.coli</i>               | $3 \pm 0.20 \times 10^7$<br>$5 \pm 0.40 \times 10^7$   $10^3$ CFU/ml | [39]      |
| 8.   | Silver nanorod array                                                    | pyocyanin<br>( <i>P. aeruginosa</i> biomarker) | 5 ppb                                                                | [40]      |

**Table ES7: Reader reference of 4MPy detection using SERS**

| S.No | Morphology                                                                    | Analyte             | LOD/EF                | Reference |
|------|-------------------------------------------------------------------------------|---------------------|-----------------------|-----------|
| 1.   | Amorphous ZnO nanocages                                                       | 4- mercaptopyridine | 10 <sup>-4</sup> M    | [41]      |
| 2.   | Flower-like Fe <sub>3</sub> O <sub>4</sub> nanostructured hollow microspheres | 4- mercaptopyridine | 10 <sup>-5</sup> M    | [42]      |
| 3.   | TiO <sub>2</sub> nanofibers coated with Ag nanoparticles                      | 4-mercaptopyridine  | 4.9 × 10 <sup>5</sup> | [43]      |
| 4.   | Kinked gold nanowires                                                         | 4-mercaptopyridine  | 10 <sup>-7</sup> M    | [44]      |
| 5.   | Gold nanoparticle functionalised porous polymer monolith                      | 4-mercaptopyridine  | 10 <sup>-7</sup> M    | [45]      |
| 6.   | Silver in polyelectrolyte multilayers                                         | 4-mercaptopyridine  |                       | [46]      |
|      |                                                                               | Rhodamine 6G (R6G)  | 10 <sup>9</sup>       |           |
| 7.   | α-Fe <sub>2</sub> O <sub>3</sub> nanocrystals (sphere, spindle, cube)         | 4-mercaptopyridine  | 10 <sup>4</sup>       | [47]      |
| 8.   | Ag-NP assembled bi-nanoring arrays                                            | Benzenethiol        | 10 <sup>7</sup>       | [48]      |
|      |                                                                               | 4-mercaptopyridine  | 10 <sup>10</sup>      |           |
| 9.   | Polydopamine assisted in situ silver nanoparticle deposition                  | 4-mercaptopyridine  | 10 <sup>7</sup>       | [49]      |
| 10.  | Electrochemically roughened silver electrodes                                 | 4-mercaptopyridine  | 1mM                   | [50]      |

**Table ES8: SERS activity comparative with different anisotropic structures**

| S.No | Morphology                                   | Analyte                                     | LOD/EF                                    | Reference |
|------|----------------------------------------------|---------------------------------------------|-------------------------------------------|-----------|
| 1.   | Gold nanostars                               | 4- mercaptopyridine                         | nM                                        | [51]      |
| 2.   | Gold nanostars                               | five different types of breast cancer cells | -NA-                                      | [52]      |
| 3.   | Silver embedded nanostars                    | R6G                                         | $\mu\text{M}$                             | [53]      |
| 4.   | Silver coated gold tetrapod                  | R6G                                         | $1.73 \times 10^6$                        | [54]      |
| 5.   | Core shell gold@silver nanorods              | 4-mercaptobenzoic acid (4-MBA)              | $\sim 10^{10}$                            | [55]      |
| 6.   | Ag NRs@HfO <sub>2</sub>                      | Methylene Blue<br>Crystal Violet            | $10^{-6}$ M<br>$10^{-5}$ M                | [56]      |
| 7.   | Au@Ag hexagonal nanorings                    | 4-MBA                                       | $\sim 10^6$                               | [57]      |
| 8.   | Ag-NP assembled bi-nanoring arrays           | R6G<br>Polychlorinated Bi-phenyls           | $1 \times 10^{-12}$<br>$1 \times 10^{-9}$ | [58]      |
| 9.   | Ag–Au hollow nanostructures                  | R6G                                         | $1.73 \times 10^6$                        | [59]      |
| 10.  | Dendritic Silver nanostructures (This study) | R6G                                         | $10^{-15}$ M                              |           |

## References

1. J. Senguttuvan, S. Paulsamy and K. Karthika, *Asian Pacific Journal of Tropical Biomedicine*, 2014, **4**, S359-S367.
2. P. Tiwari, B. Kumar, M. Kaur, G. Kaur and H. Kaur, *Internationale pharmaceutica sciencia*, 2011, **1**, 98-106.
3. W.C Evans, "Treaseand Evans Pharmacognosy", Harcourt Brace and company, Asia pvt. Ltd.Singapore, 1997.
4. M.D. Mace, *Phytopathology*,1963, **16**, 915-925.
5. He, F. Bradford Protein Assay Bio-protocol, 2011, Bio101: e45.
6. M. Flores-González, M. Talavera-Rojas, E. Soriano-Vargas and V. Rodríguez-González, *New J. Chem.*, 2018,**42**, 2133-2139.
7. M. A. Asghara,, E. Zahir, S. M. Shahid, M. N. Khan, M. A. Asghar, J. Iqbal and G. Walker, *LWT - Food Science and Technology*, 2018, **90**, 98–107.
8. M. Nasiriboroumand, M. Montazer and H. Barani, *J Photochem Photobiol B.*, 2018, **179**, 98–104.
9. W. Xu, Y. Fan, X. Liu, D. Luo, H. Liu and N. Yang, *Mater. Res. Express*, 2018, 5:4
10. A.P.C. Ribeiro, S. Anbu, E.C.B.A. Alegria, A.R. Fernandes, P.V. Baptist, R. Mendes, A.S. Matias, M. Mendes, M.F.C. Guedes da Silva and A.J.L. Pombeiro, *Biomed Pharmacother*, 2018, **101**, 137–144.
11. P.Selvakumar, R. Sithara, K. Viveka and P.Sivashanmugam, *J Photochem Photobiol B.*, 2018, **182**, 52–61.
12. K. Ramar, V. Vasanthakumar, A. Priyadharsan, P. Priya, V. Raj, P. M. Anbarasan, R. Vasanthakumari and A. Jafar Ahamed, *J. Mater. Sci. Mater. Electron*, 2018, **29**, 11509–11520.
13. M. N. Nadagouda, N. Iyanna, J. Lalley, C. Han, D. D. Dionysiou and R. S. Varma, *ACS Sustainable Chem. Eng.*, 2014, **2**, 1717–1723.
14. E. C. Njagi, H. Huang, L. Stafford, H. Genuino, H. M. Galindo, J. B. Collins, G. E. Hoag and S. L. Suib, *Langmuir*, 2011, **27(1)**, 264–271.
15. A. R. Vilchis-Nestor, V. Sánchez-Mendieta, M. A. Camacho-López, R. M. Gómez-Espinosa, M. A. Camacho-López and J. A. Arenas-Alatorre, *Mater. Lett.*, 2008, **62**, 3103–3105.
16. Y. Y. Loo, B. W. Chieng, M. Nishibuchi and S. Radu, *Int. J. Nanomed.*, 2012,**7**, 4263–4267.

17. X. Qin, H. Wang, X. Wang, Z. Miao, Y. Fang, Q. Chen and X. Shao, *Electrochim. Acta*, 2011, **56(9)**, 3170-3174.
18. X. K. Wang, L. Shao, W. L. Guo, J. G. Wang, Y. P. Zhu and C. Wang, *Ultrason. Sonochem.*, 2009, **16**, 747–751.
19. K. G. M. Laurier, M. Poets, F. Vermoortele, G. De Cremer, J. A. Martens, H. Uji-i, D. E. De Vos, J. Hofkens and M. B. J. Roefsaers, *Chem. Commun.*, 2012, **48**, 1559–1561.
20. L. He, M. Lin, H. Lib and N. J. Kimb, *J. Raman Spectrosc.*, 2010, **41**, 739–744.
21. L. Fan and R. Guo, *Cryst. Growth Des.*, 2008, **8**, 7, 2150–2156.
22. L. Lu, A. Kobayashi, Y. Kikkawa, K. Tawa and Y. Ozaki, *J. Phys. Chem. B*, 2006, **110**, 23234-23241.
23. Q. Zhou, S. Wang, N. Jia, L. Liu, J. Yang and Z. Jiang, *Mater. Lett.*, 2006, **60**, 29-30, 3789-3792
24. S. Tang, X. Meng, H. Lu and S. Zhu, *Mater. Chem. Phys.*, 2009, **116**, 464–468.
25. X. Wang, K. Naka, H. Itoh, S. Park and Y. Chujo, *Chem. Commun.*, 2002, 1300–1301.
26. X. Qin, Z. Miao, Y. Fang, D. Zhang, J. Ma, L. Zhang, Q. Chen and X. Shao, *Langmuir*, 2012, **28**, 5218–5226.
27. V. V. Agrawal, G. U. Kulkarni and C. N. R. Rao, *J. Colloid Interface Sci.*, 2008, **318**, 501–506.
28. E. J. Cho, J. K. Kang, W. S. Han and J. H. Jung, *Langmuir*, 2008, **24**, 5229-5232.
29. Z. Kang, E. Wang, S. Lian, B. Mao, L. Chen and L. Xu, *Mater. Lett.*, 2005, **59**, 18, 2289-2291.
30. X. Wang, H. Itoh, K. Naka and Y. Chujo, *Langmuir*, 2003, **19**, 6242-6246.
31. W. Ye, C. Shen, J. Tian, C. Wang, C. Hui and H. Gao, *Solid State Sci.*, 2009, **11**, 1088–1093.
32. S. Xie, X. Zhang, D. Xiao, M. C. Paa, J. Huang and M. M. F. Choi, *J. Phys. Chem. C*, 2011, **115**, 9943–9951.
33. Y. Wang, K. Lee, and J. Irudayaraj, *J. Phys. Chem. C*, 2010, **114**, 39, 16122–16128
34. J. Wang, X. Wu, C. Wang, Z. Rong, H. Ding, H. Li, S. Li, N. Shao, P. Dong, R. Xiao and Shengqi Wang, *ACS Appl. Mater. Interfaces*, 2016, **8**, 31, 19958–19967.
35. C. Lin, Y. Yang, P. Liao, D. Chen, H. Lin and H. Chang, *Biosens. Bioelectron.*, 2014, **53**, 519-527.



36. H. Zhang, X. Ma, Y. Liu, N. Duan, S. Wu, Z. Wang and B. Xu, *Biosens. Bioelectron.*, 2015, **74**, 872-877.
37. C. Wang, J. Wang, M. Li, X. Qu, K. Zhang, Z. Rong, R. Xiao and S. Wang, *Analyst*, 2016, **141**, 6226-6238
38. P. Drake, P.-S. Jiang, H.-W. Chang, S.-C. Su, J. Tanha, L.-L. Tay, P. Chen and Y.-J. Lin, *Anal. Methods*, 2013, **5**, 4152-4158.
39. B. Ankamwar, U. K. Sur and P. Das, *Anal. Methods*, 2016, **8**, 2335-2340.
40. X. Wu, J. Chen, X. Li, Y. Zhao and S. M. Zughair, *Nanomedicine*, 2014, **10**, 8, 1863-1870.
41. X. Wang, W. Shi, Z. Jin, W. Huang, J. Lin, G. Ma, S. Li and L. Guo, *Angew. Chem. Int. Ed.*, 2017, **56**, 9851-9855.
42. Q. Gao, A. Zhao, Z. Gan, W. Tao, D. Li, M. Zhang, H. Guo, D. Wang, H. Sun, R. Mao and E. Liu, *Cryst Eng Comm*, 2012, **14**, 4834-4842.
43. W. Song, Y. Wang and B. Zhao, *J. Phys. Chem. C*, 2007, **111**, 34, 12786-12791.
44. X. Hong, D. Wang and Y. Li, *Chem. Commun.*, 2011, **47**, 9909-9911.
45. Y. Pan, X. Wang, H. Zhang, Y. Kang, T. Wu and Y. Du, *Anal. Methods*, 2015, **7**, 1349-1357
46. J. Zhou, S. Xu, W. Xu, B. Zhao and Y. Ozaki, *J. Raman Spectrosc.*, 2009, **40**, 31-37.
47. X. Fu, F. Bei, X. Wang, X. Yang and L. Lu, *J. Raman Spectrosc.*, 2009, **40**, 1290-1295.
48. G. Macias, M. Alba, L. F. Marsala and A. Mihi, *J. Mater. Chem. C*, 2016, **4**, 3970-3975
49. P. Wang, Y. Zhou, Y. Wen, F. Wang and H. Yang, *RSC Adv.*, 2015, **5**, 36368-36373.
50. Y. Chao, Q. Zhou, Y. Li, Y. Yan, Y. Wu and J. Zheng, *J. Phys. Chem. C*, 2007, **111**, 16990-16995.
51. X. Meng, J. Dyer, Y. Huo and Chaoyang Jiang, *Langmuir*, 2020, **36**, 13, 3558-3564.
52. D. Jimenez de Aberasturi, A. B. Serrano-Montes, J. Langer, M. Henriksen-Lacey, W. J. Parak and L. M. Liz-Marzán, *Chem. Mater.*, 2016, **28**, 18, 6779-6790.
53. A. M. Fales and T. Vo-Dinh, *J. Mater. Chem. C*, 2015, **3**, 7319-7324
54. J. Zhu, X.-H. C. Jian-Jun, L. Jun, W. Zhao, *Spectrochim. Acta A*, 2019, 211, 154-165.
55. G. Bhattacharjee, M. Bhattacharya, A. Roy, D. Senapati, and B. Satpati, *ACS Appl. Nano Mater.*, 2018, **1**, 10, 5589-5600.
56. L. Ma, H. Wu, Y. Huang, S. Zou, J. Li and Z. Zhang, *ACS Appl. Mater. Interfaces*, 2016, **8**, 40, 27162-27168
57. W. Lai, J. Zhou, Z. Jia, L. Petti and P. Mormile, *J. Mater. Chem. C*, 2015, **3**, 9726-9733

58. X. Hu, G. Meng, Q. Huang, C. Zhu, B. Chen, Z. Huang, F. Li and Z. Wang, *ACS Appl. Mater. Interfaces*, 2014, **6**, 11, 7991–7995.
59. Y. Yang, Q. Zhang, Z.-W. Fu and Dong Qin, *ACS Appl. Mater. Interfaces*, 2014, **6**, 5, 3750–3757
